# Supplementary material for: SCD2-mediated monounsaturated fatty acid metabolism regulates cGAS-STING-dependent type I IFN in CD4+ T cells
Source: Research Square preprint supplement (doi:10.21203/rs.3.rs-385210/v1), 2021-04-12

Supplementary Fig.1 Type I IFN changes the expression of genes related to lipid synthesis in mouse and human CD4<sup>+</sup> T cell related to Fig.1.

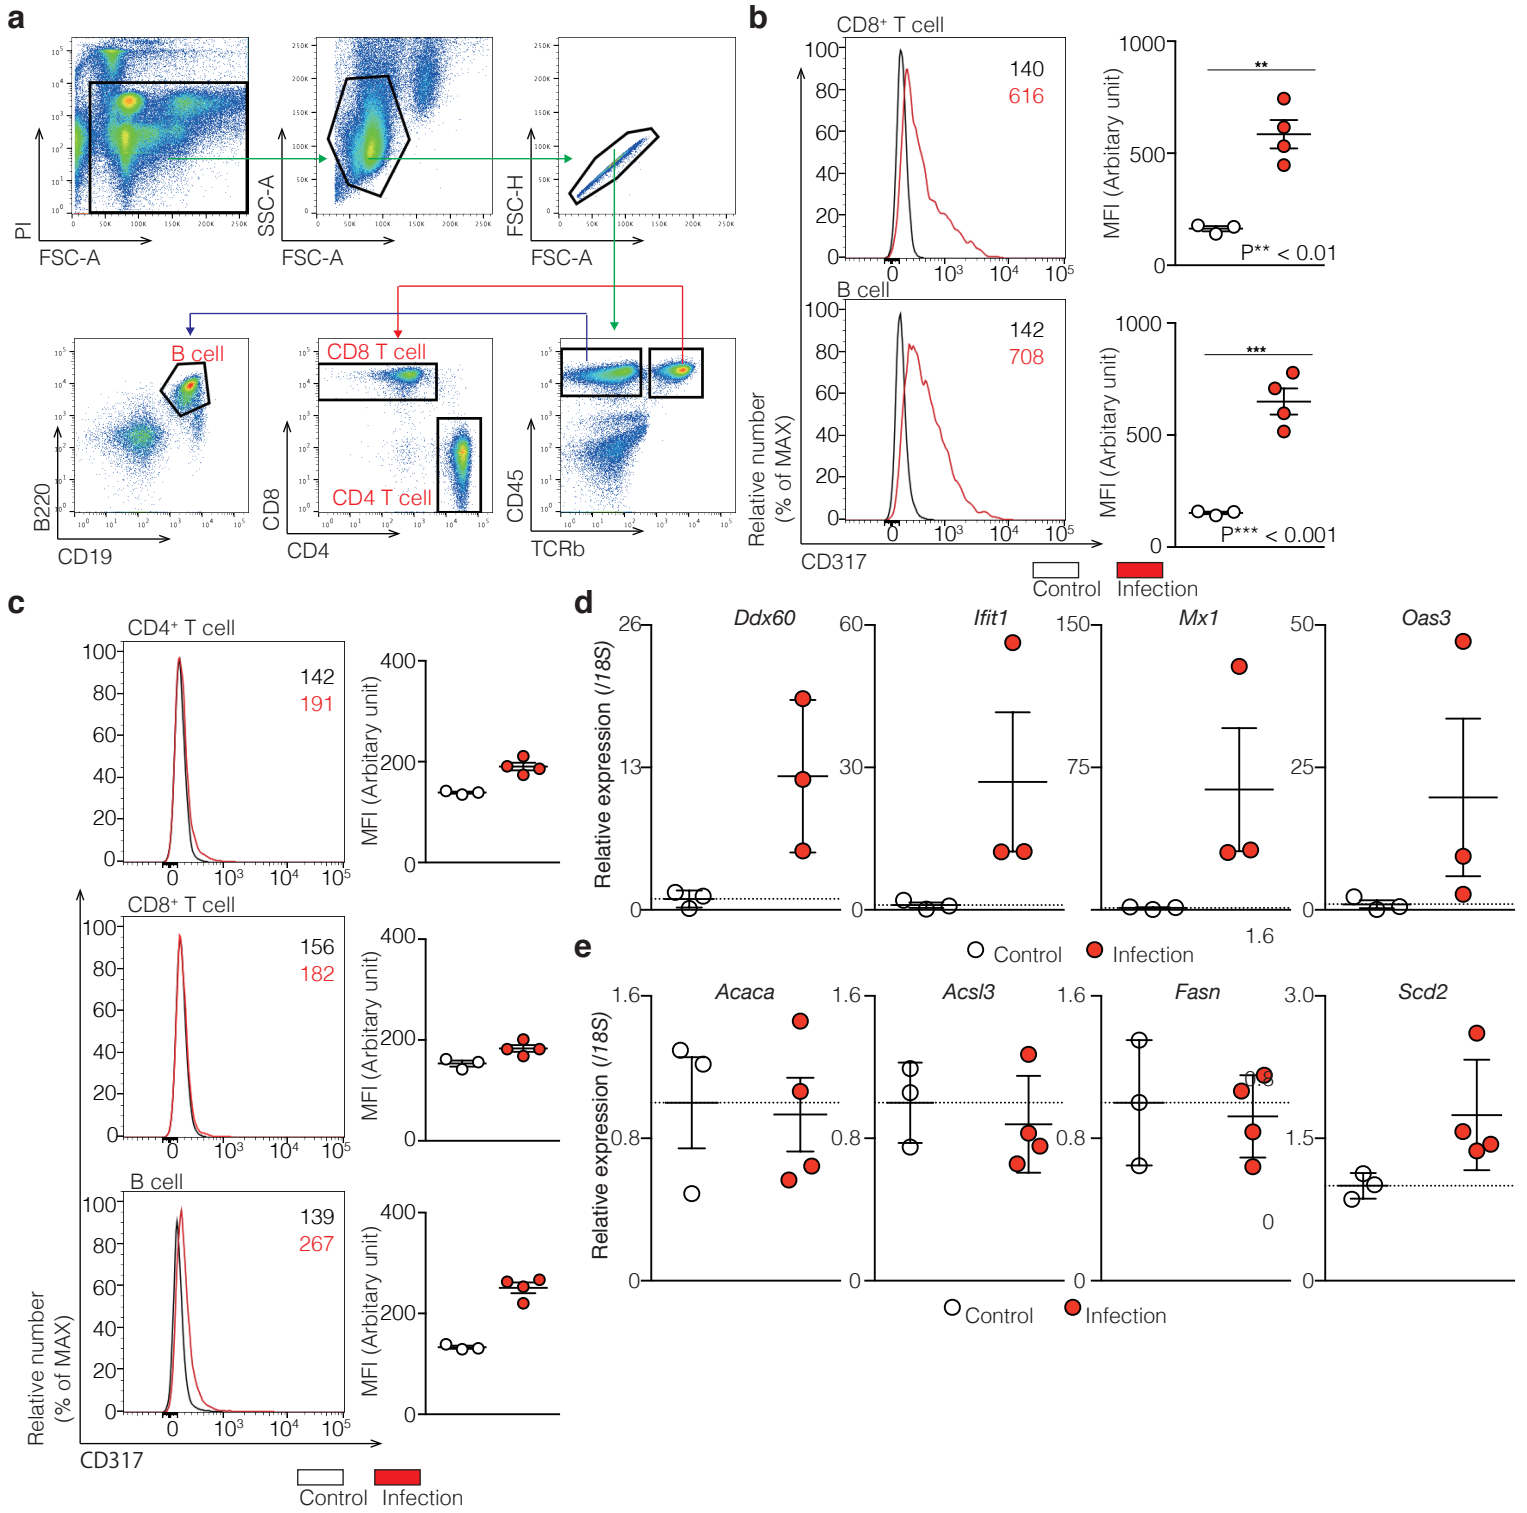

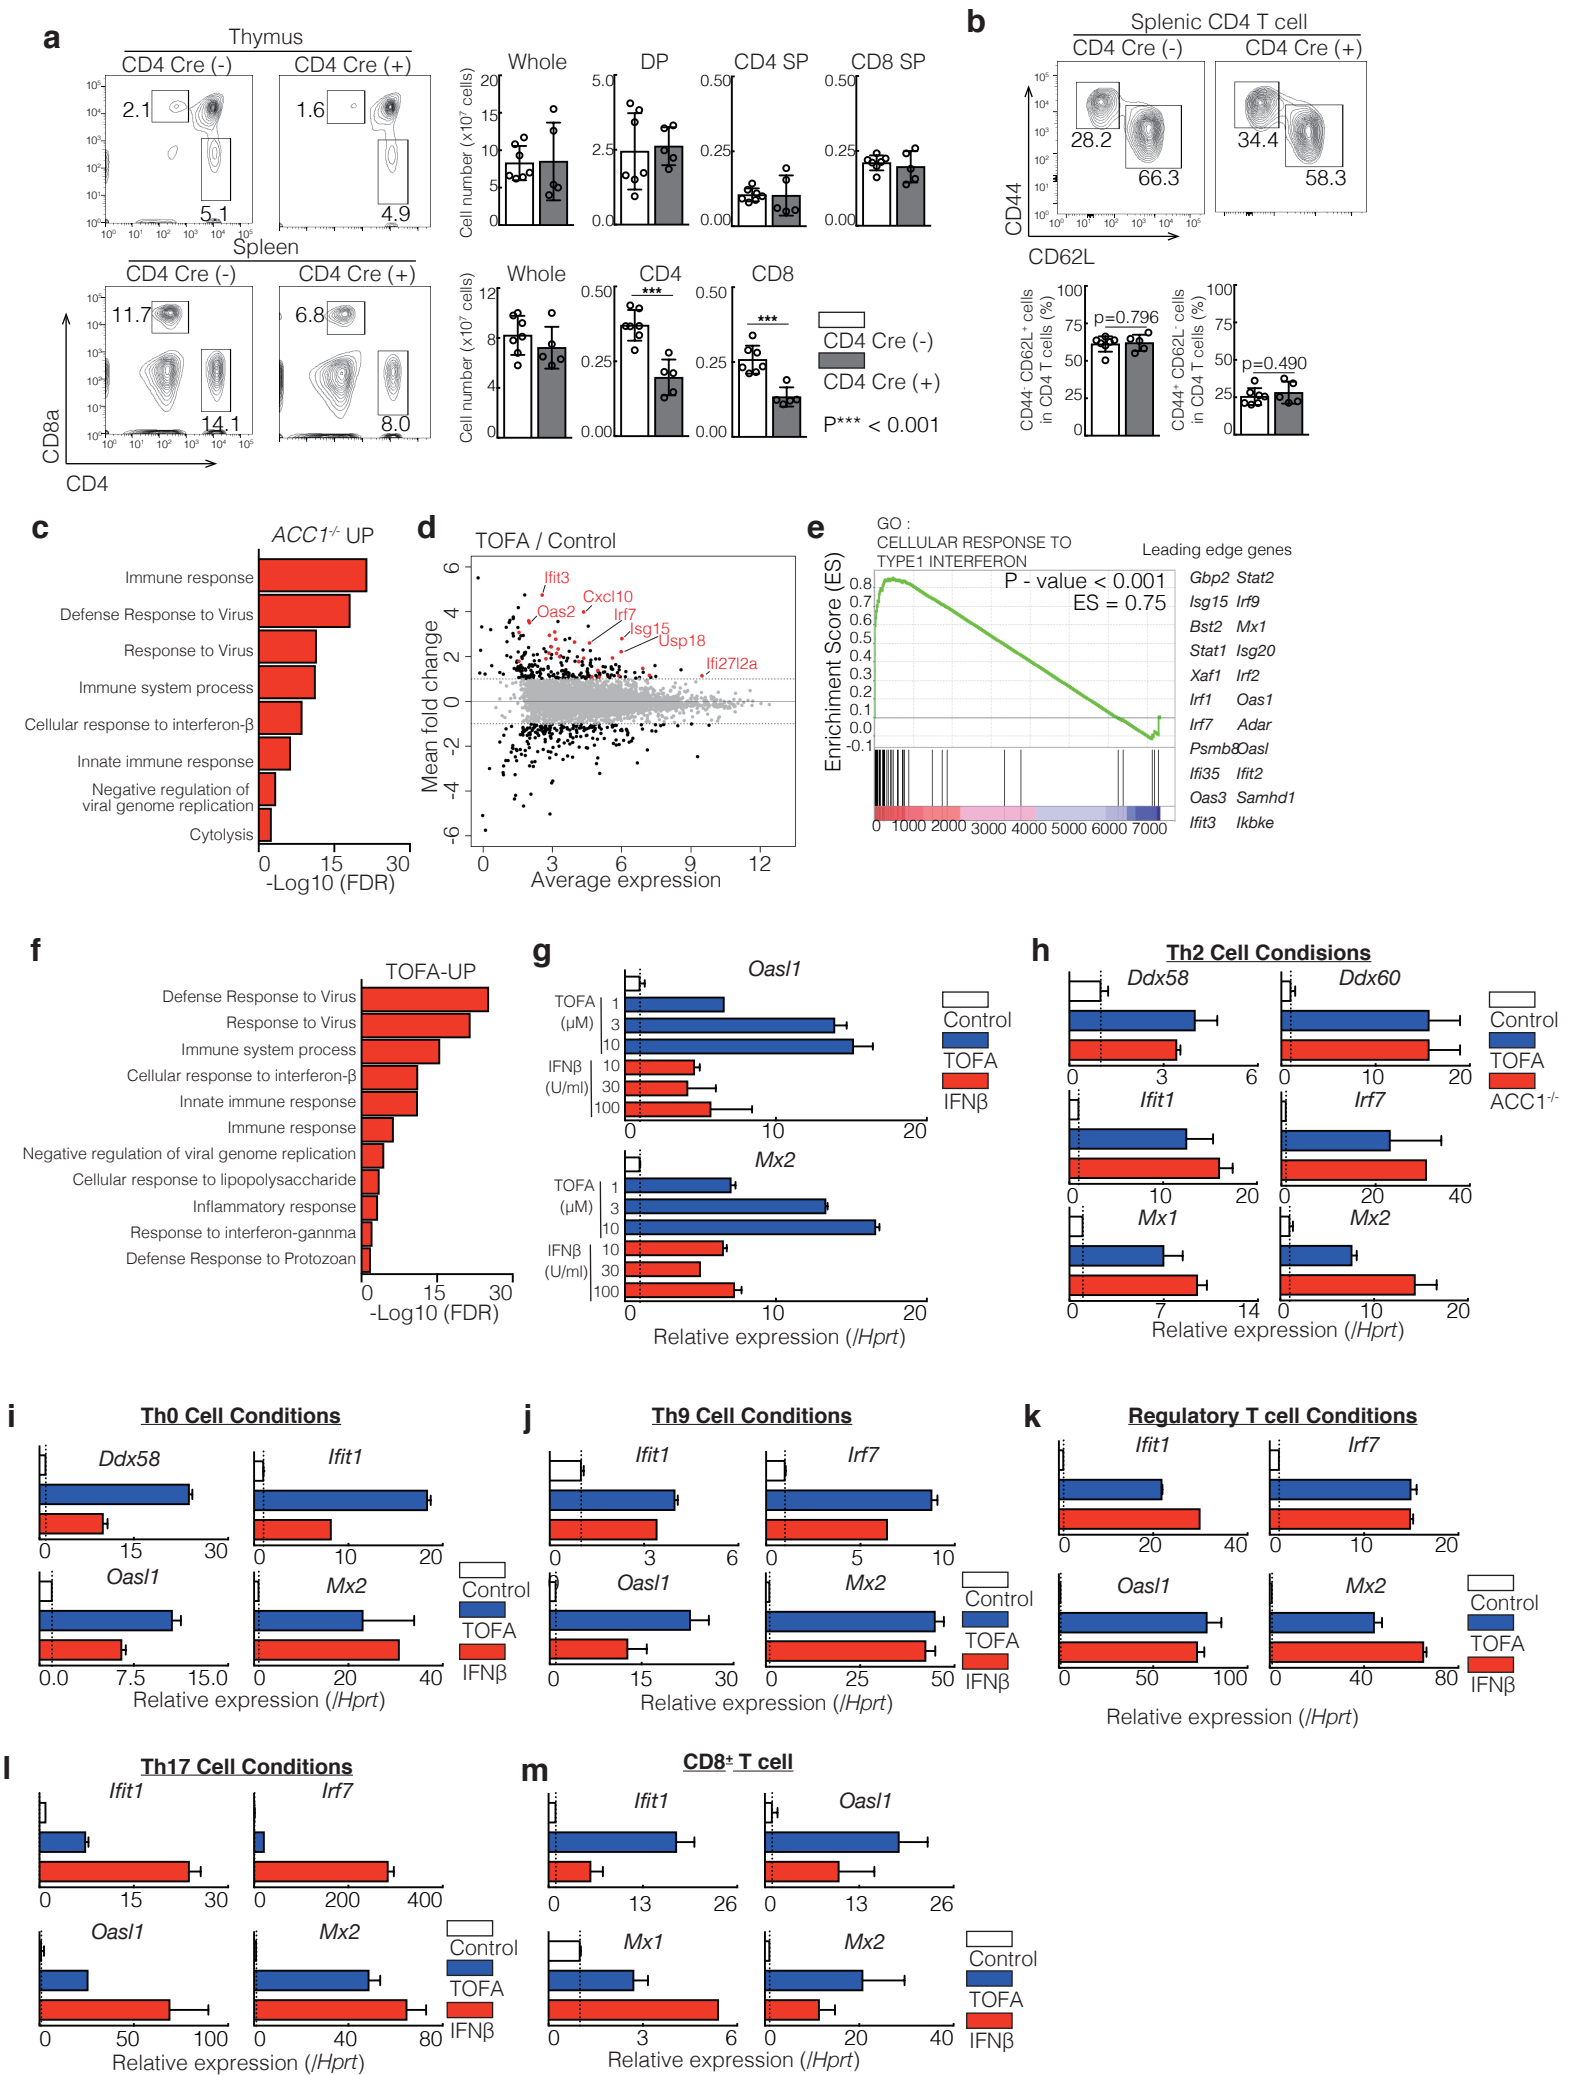

Supplementary Fig.3 IFN $\alpha$  produced by Th1 cells with lower activity of fatty acid synthesis acts in a paracrine manner related to Fig.3.

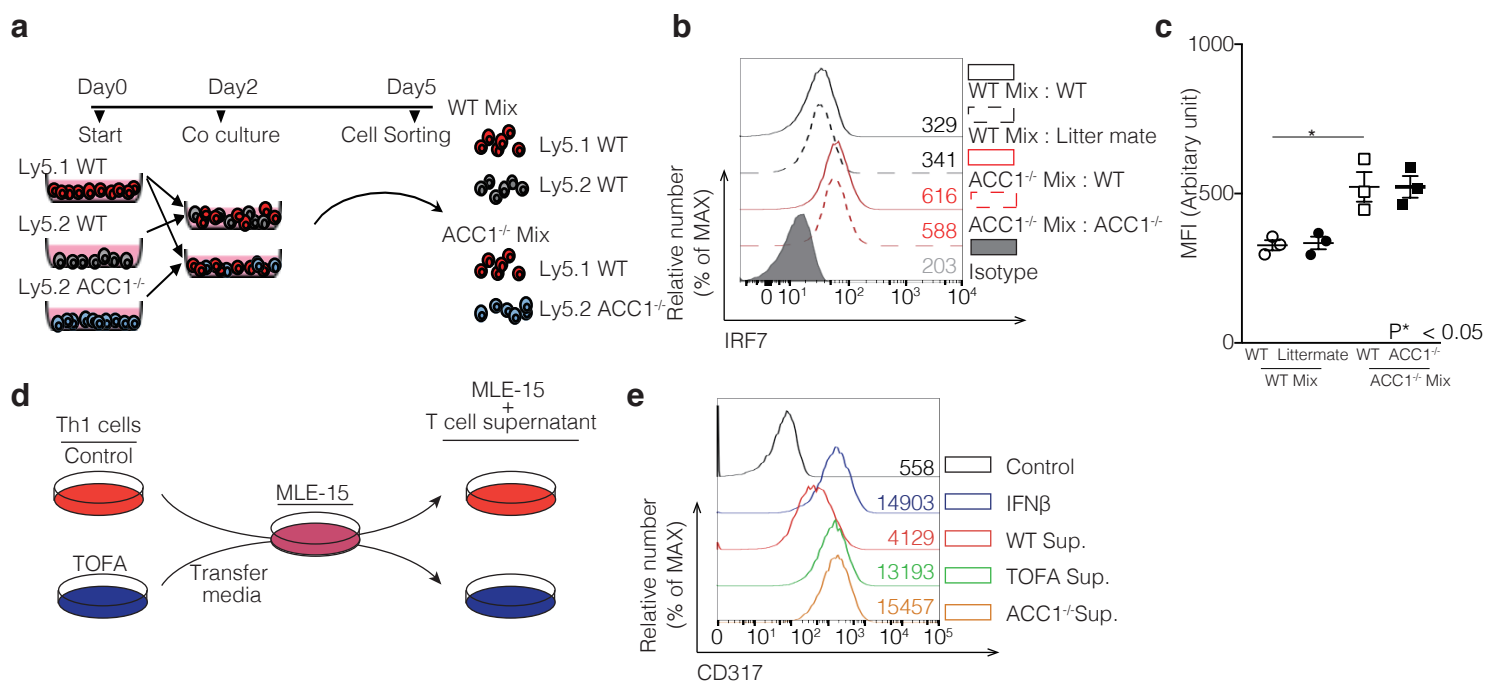

Supplementary Fig.4 Inhibition of MUFA synthesis is important for the Induction of ISGs in CD4<sup>+</sup> T cells related to Fig.4.

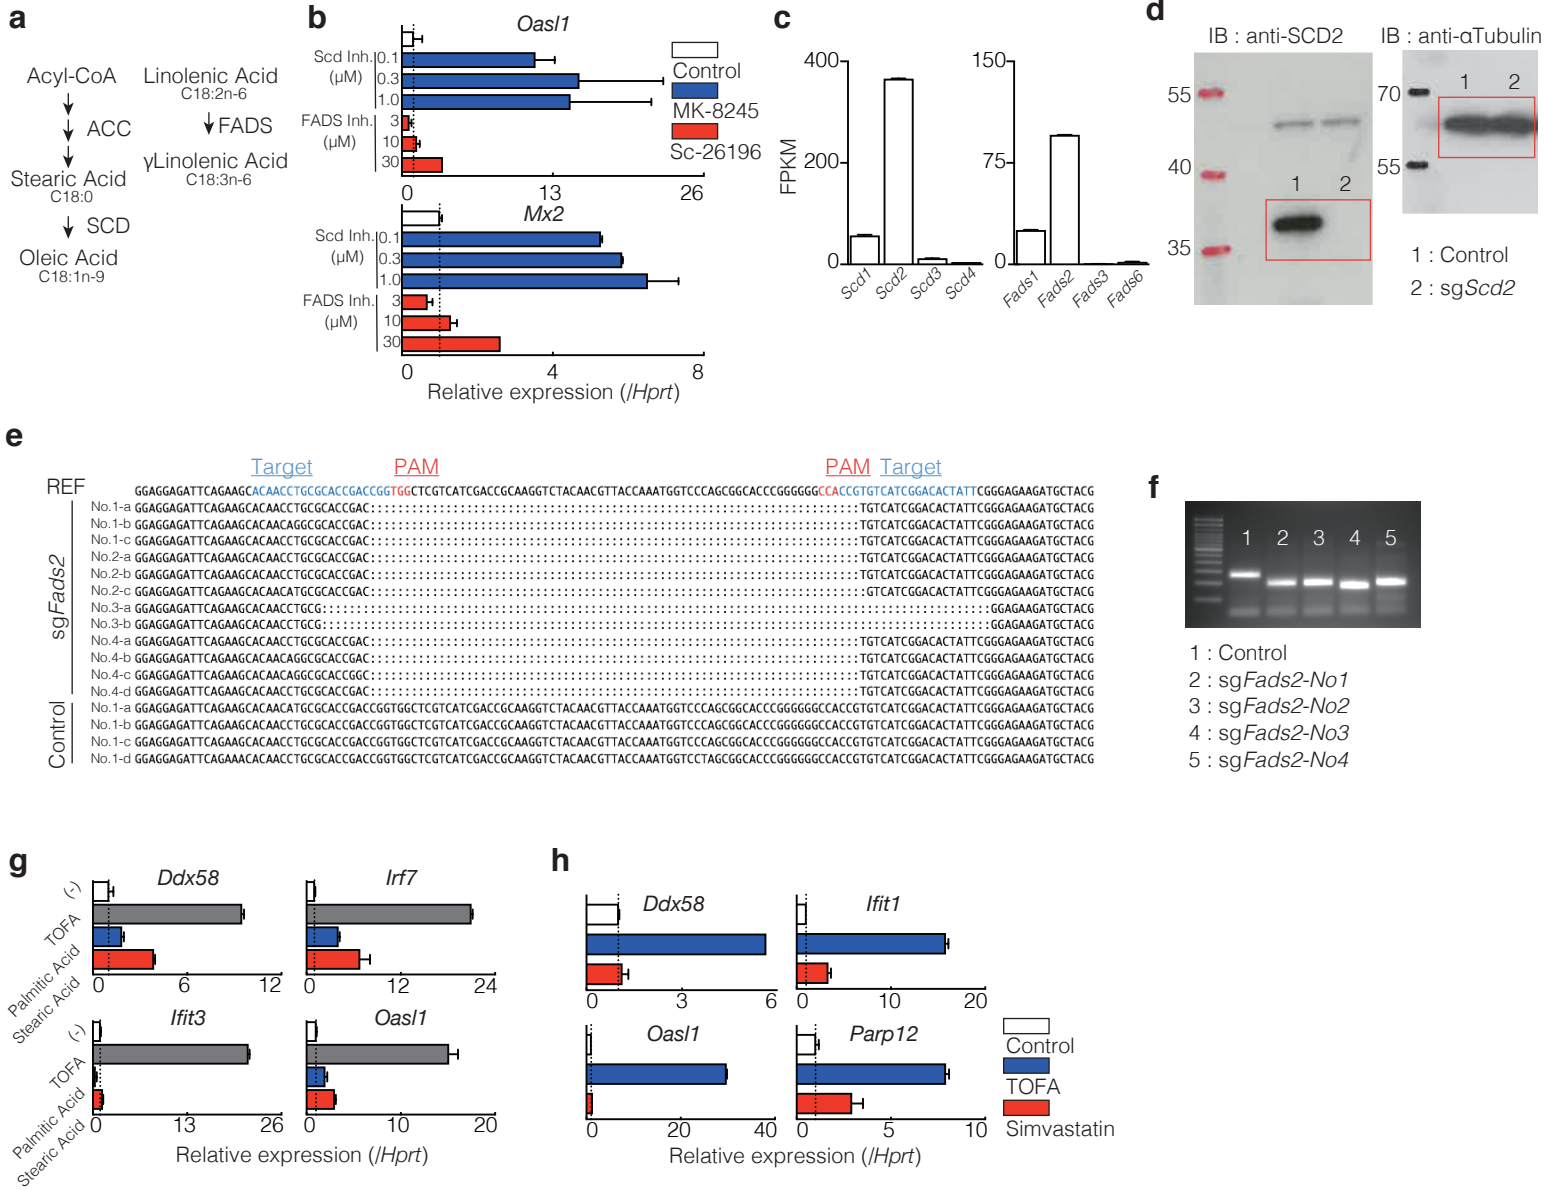

**Supplementary Fig.5 CRISPR-Cas9 mediated genome edition occurs decreased protein expression related to Fig.5.**

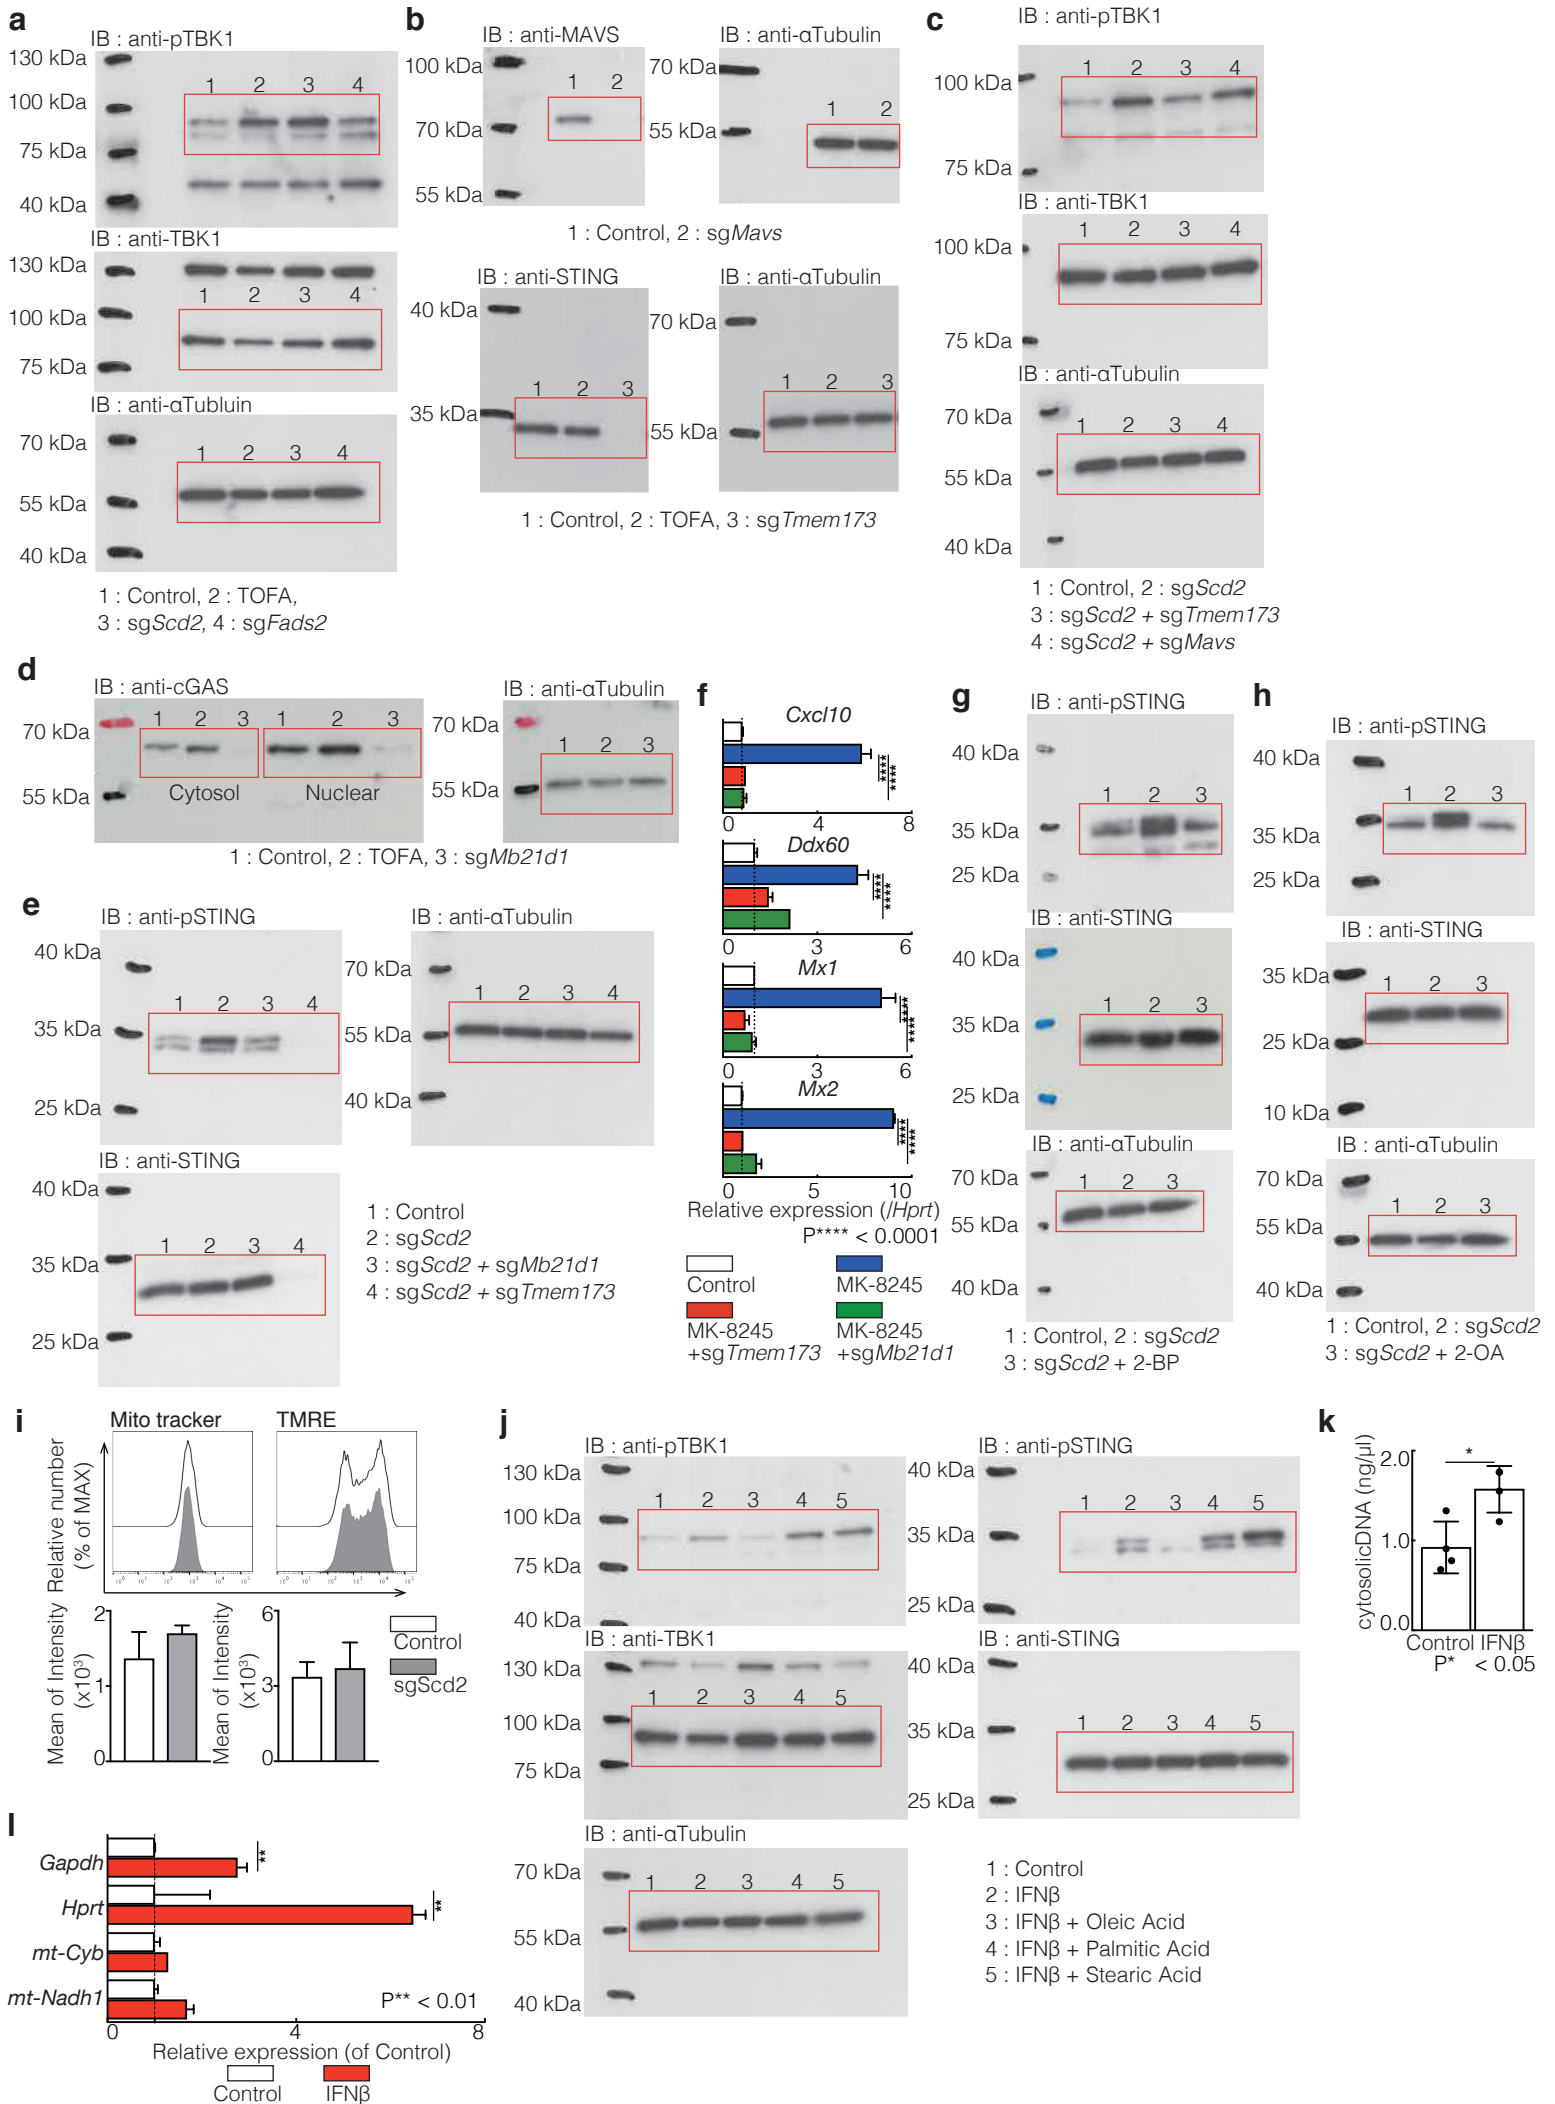

Supplementary Fig.6 Abrogation of fatty acid synthesis pathway changes in the lipid composition related to Fig.6.

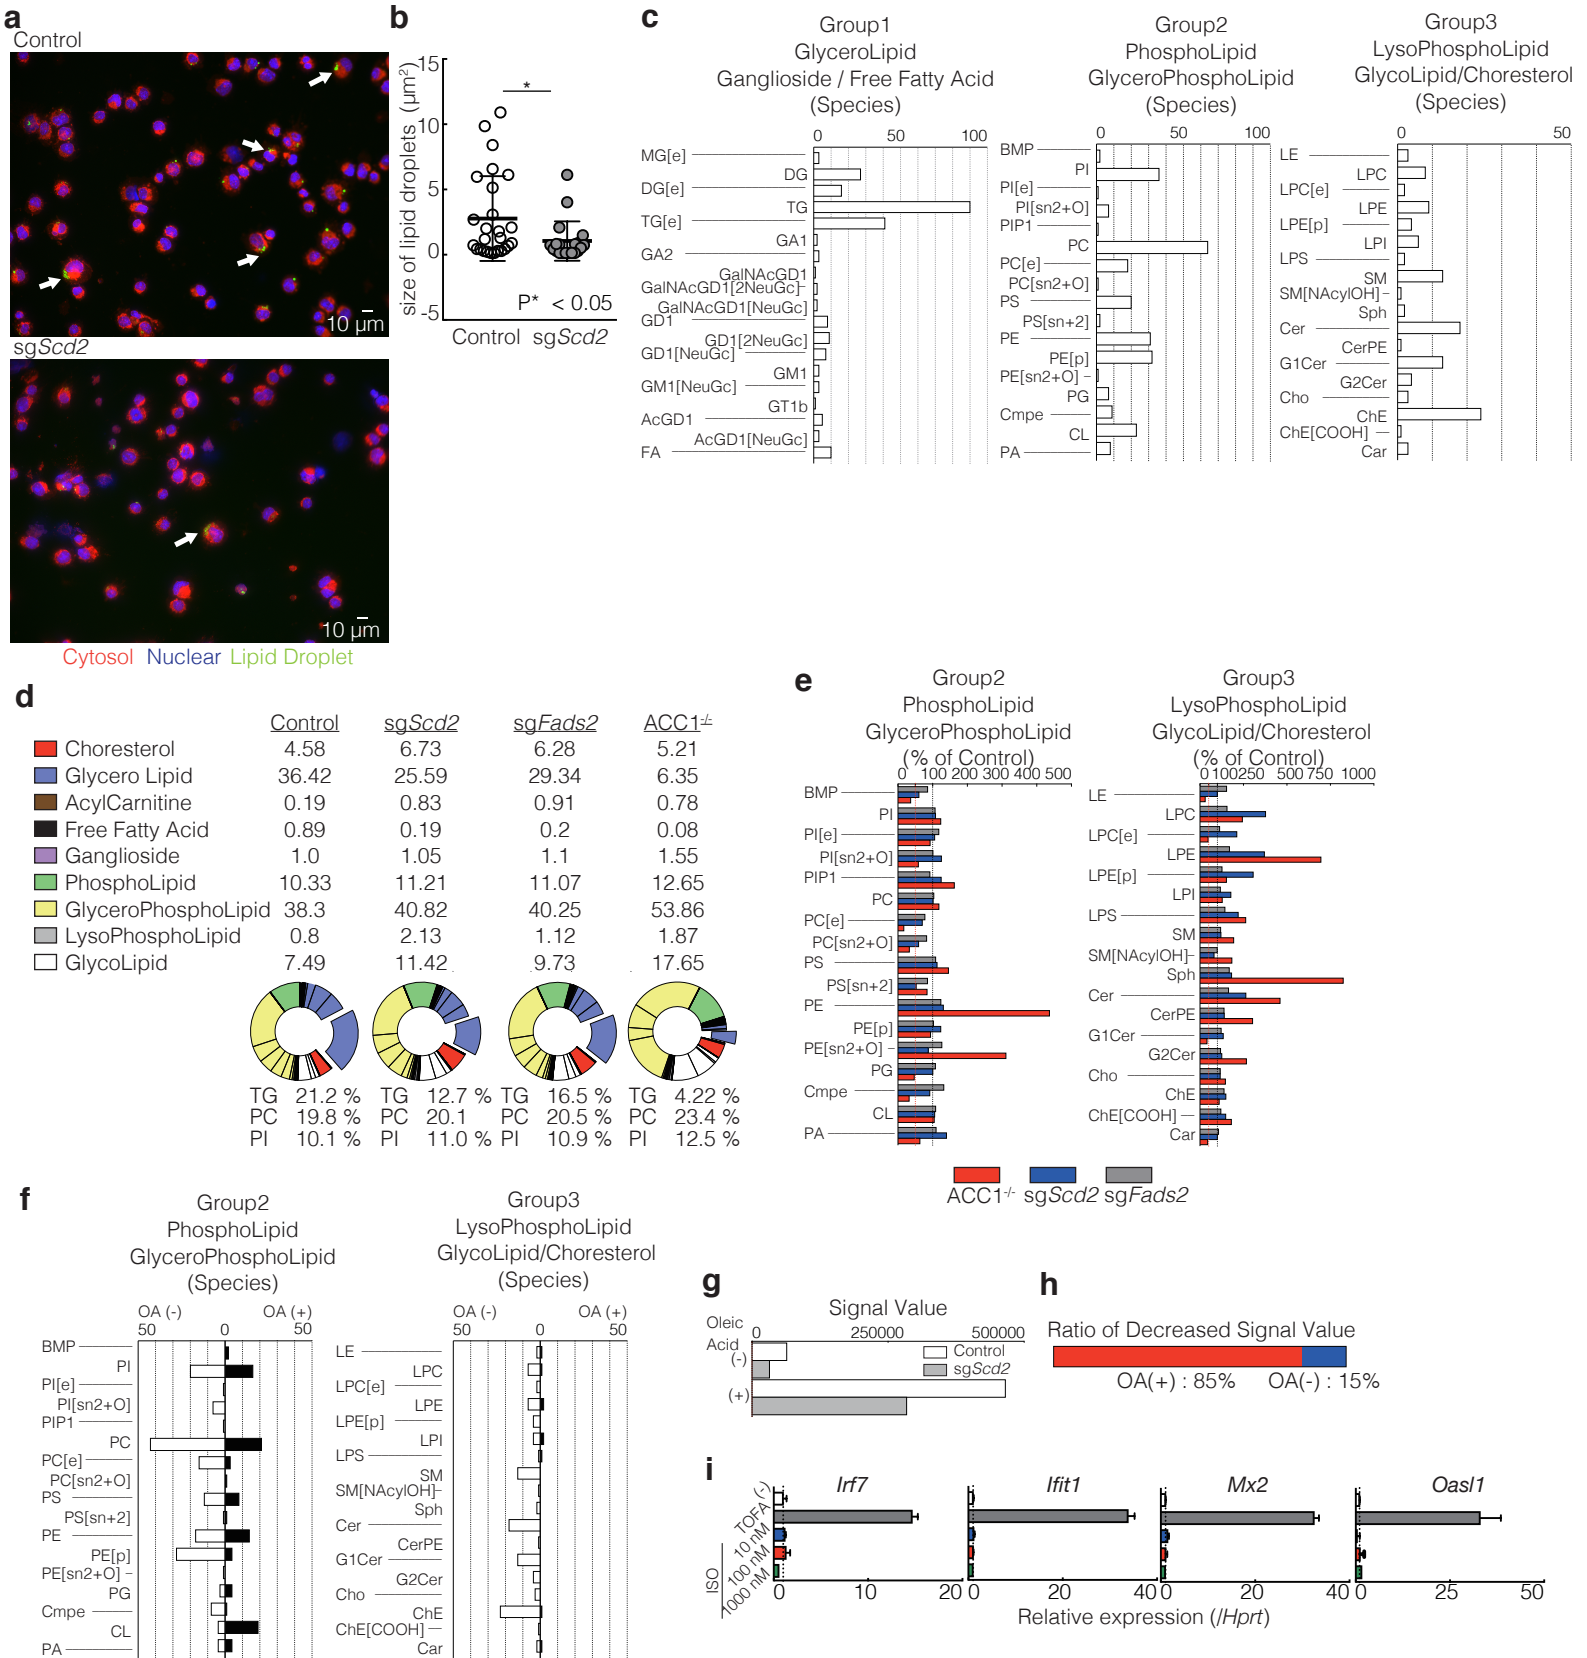

Supplement: Supplementary file 1 [file de159eeebca2146be8f68dcb.pdf]
